# Supplementary material for: Design and post-functionalisation of ordered mesoporous zirconia thin films
Source: Royal Society of Chemistry journal article supplement (doi:10.1039/b104623n), 2001-01-01
Supplement: b104623n.doc [file b104623n.doc]

# Supplementary Information

**Design and post-functionalisation of oriented mesoporous zirconia thin films**

**Eduardo L. Crepaldi,*a* Galo J. de A. A. Soler-Illia,*a* David Grosso,*a* Pierre-Antoine Albouy*b* and Clément Sanchez**a***

*a Laboratoire Chimie de la Matière Condensée, Université Pierre et Marie Curie, 4 Place Jussieu, 75252 Paris Cedex 05, France. E-mail: clems@ccr.jussieu.fr.*

*b Laboratoire de Physique des Solides, Université Paris-Sud, 91405 Orsay Cedex, France.*


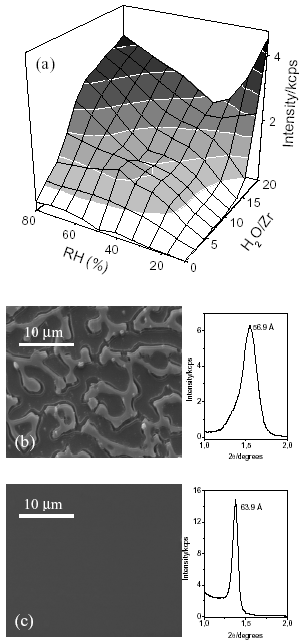


**Fig. S1** (a) Plot of the (100) XRD peak intensity as a function of the water content in solution and relative humidity in the atmosphere during the processing of the film. SEM images and the respective XRD diagrams for films obtained at 10% humidity and 20 H2O/Zr in solution: (b) as-prepared; and (c) post-processed by submission to very high humid atmosphere (>80%) for 10 seconds.

**Post-functionalisation**. Mesoporous zirconia films (treated at 220°C, followed by UV/O3 treatment) were immersed in 0.01 mol dm–3 THF solutions of the probes at room temperature (for 15 minutes to 24 hours period), washed several times with THF, and dried in air at room temperature; UV-visible and/or infrared spectroscopy were performed to confirm the grafting. For comparison, “dense” films were prepared by dip-coating a surfactant-free solution, following exactly the same treatment thereafter. The latter films did not show any response in the UV-VIS (carried out using dense films as blank) or in the FT-IR spectrum, independently of the organic probe, time of contact with the probe solution and the method used to prepare the film. On the other hand, for mesoporous films intense, well defined bands were observed both in the UV-VIS and in the FT-IR spectrum. DBM-grafted mesoporous zirconia films showed a band at 364 nm in the UV-VIS spectrum with absorbance of 0.2, a value that may be considered high taking into account the very short optical pass (see Fig. 2) The intensity of the band practically did not change with the contact time, suggesting that the grafting process is very fast. For comparison, the band observed for free DBM in THF solution is at 344 nm. The addition of a stoichiometric (1:1) amount of Zr(OPr)4 [Zirconium(IV) n-propoxyde] to this solution resulted in a shift of the band to 368 nm, indicating that the specie present in the DBM-grated zirconia film is really a DBM-Zr complex [pure Zr(OPr)4 THF solution showed no appreciable light absorption in this region]. The FT-IR spectrum for DBM-grafted ZrO2 mesoporous film showed three bands between 1600 and 1400 cm-1 that can be assigned to the stretching of the C–C and C–O bonds of the 6 members ring of the complex between the -diketone and Zr. Moreover, the very weak bands between 700 and 600 cm-1 can be attributed to the deformation of the same ring, all these results indicating grafting (see Fig. 2).

FT-IR was used to access the grafting of phenylphosphonic acid; the main signals of a PPA-grafted zirconia mesoporous film appear at *ca*. 1438 and 994 ( P–C), 1144 ( P=O) and 1042 ( P–O) cm–1. The band at c. a. 1144 cm–1 was also observed in the spectrum of pure PPA, indicating that the bond P=O was not affected by grafting. On the other hand, the band at 1042 cm–1 was observed in spectrum of the pure compound as two bands at 1019 and 939 cm–1. This result indicates the bond of the phosphonic group as a bidentate ligand, and is also in a very good agreement with the one observed for PPA-grafted -Fe2O3 (1050 cm–1).[[1]](#endnote-2) In addition, the complete absence of bands near 1220 cm–1 ( O–H of the phosphonic acid) indicate that the phosphonic group is not in its acid form.

MTR-grafted mesoporous films showed a slight broad and intense band (absorbance  0.25) at 468 nm in the UV-VIS spectrum, contrasting with the band for this compound (pure) in THF solution, at 411 nm, again indicating grafting. FT-IR signals of an MTR-grafted ZrO2 film show intense bands at 1585, 1548, 1452 and 1403 cm-1. In the same region, 1600-1400 cm-1, some low intense bands were also observed, which can be attributed to the vibration of the C=C bond of the aromatic rings. The presence of these bands and the absence of bands in the region around 1700 cm-1 indicates that MTR is in its carboxylate form, successfully grafted, and the separation between the lines indicates that two possible complexes are present, a bidentate (1548 and 1452 cm-1) and a bridging bidentate (1585 and 1403 cm-1).[[2]](#endnote-3) Similar results were observed for FCA-grafted films, also indicating the bonding of this probe to Zr(IV).

**Fig. S2** (a) Ultraviolet-visible spectra for dibenzoylmethane (DBM) according to the indicated conditions. (b) FT-IR spectrum for DBM-grafted ZrO2 mesoporous film. The arrows indicate the main bands of the DBM-Zr complex.

All these results demonstrate that the post-functionalisation of mesoporous zirconia films is feasible and straightforward. By direct comparison with dense films, it is clear that the high surface area of the mesoporous films is accessible, which indicates that the diffusion inside the pores is not hindered by the parallel alignment characteristic of the 2D structures, probably as a result of microdefects in the pore walls, as it can be visualised in Fig. 1f of the published article. Moreover, it was recently demonstrated that the use of poly(ethylene oxide) based templates give rise to microporosity in the walls of the mesopores, as a result of the penetration of the PEO polar head of the surfactant in the inorganic network. Besides the diffusion expected inside micropores, this is another possible way to interconnect the aligned mesopores in the 2D structure.[[3]](#endnote-4)

This method of functionalisation is very simple and versatile. Furthermore, the demonstrated incorporation (grafting) of a very high amount of functional groups (compared to the dense films) indicated that the pores are at the same time accessible and well aligned along the substrate surface

## References

1. M. I. Tejedor-Tejedor and M. A. Anderson, *Langmuir*, 1990, **6**, 602. [↑](#endnote-ref-2)
2. K. Nakamoto, Infrared and Raman Spectra of Inorganic and Coordination Compounds, John Wiley & Sons, New York, 4th edn., 1986. [↑](#endnote-ref-3)
3. R. Ryoo, C. H. Ko, M. Kruk, V. Antochshuk and M. Jaroniec, *J. Phys. Chem. B*, 2000, **104**, 11465. [↑](#endnote-ref-4)
